# Supplementary material
Source: Frontiers journal article supplement (https://www.frontiersin.org/articles/221104)

**FigS1.** Summary of STRR genotypes of the isolates from *Blasia pusilla* L. and soil to which the plants were attached. Two plants from Kvaløya island and two plants from Skibotn location were studied. The number of isolates was 200 for each individual plant and soil sample. The abundance of the genotypes is shown in Fig2 in the main text.

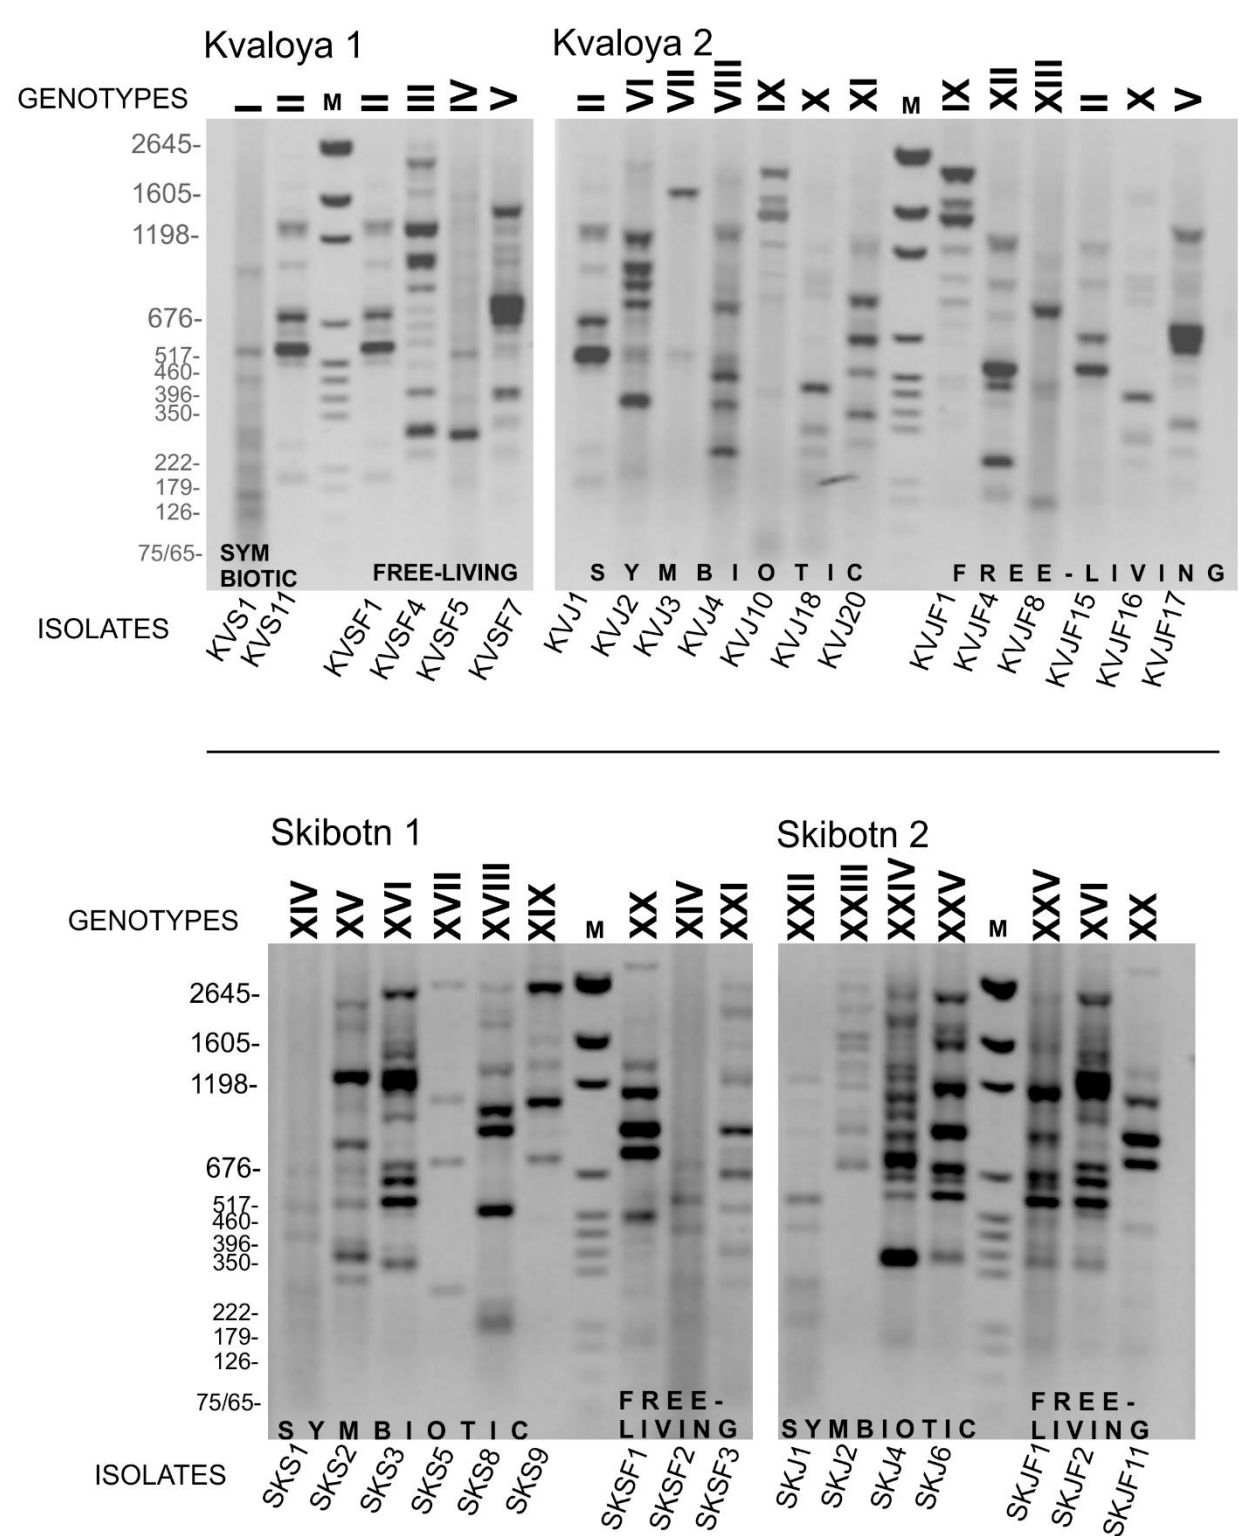

Supplement: Image_1.PDF [file Image_1.PDF]
