# Supplementary material
Source: Frontiers journal article supplement (https://www.frontiersin.org/articles/221104)

Figure S4. An overview of the workflow implemented in this study

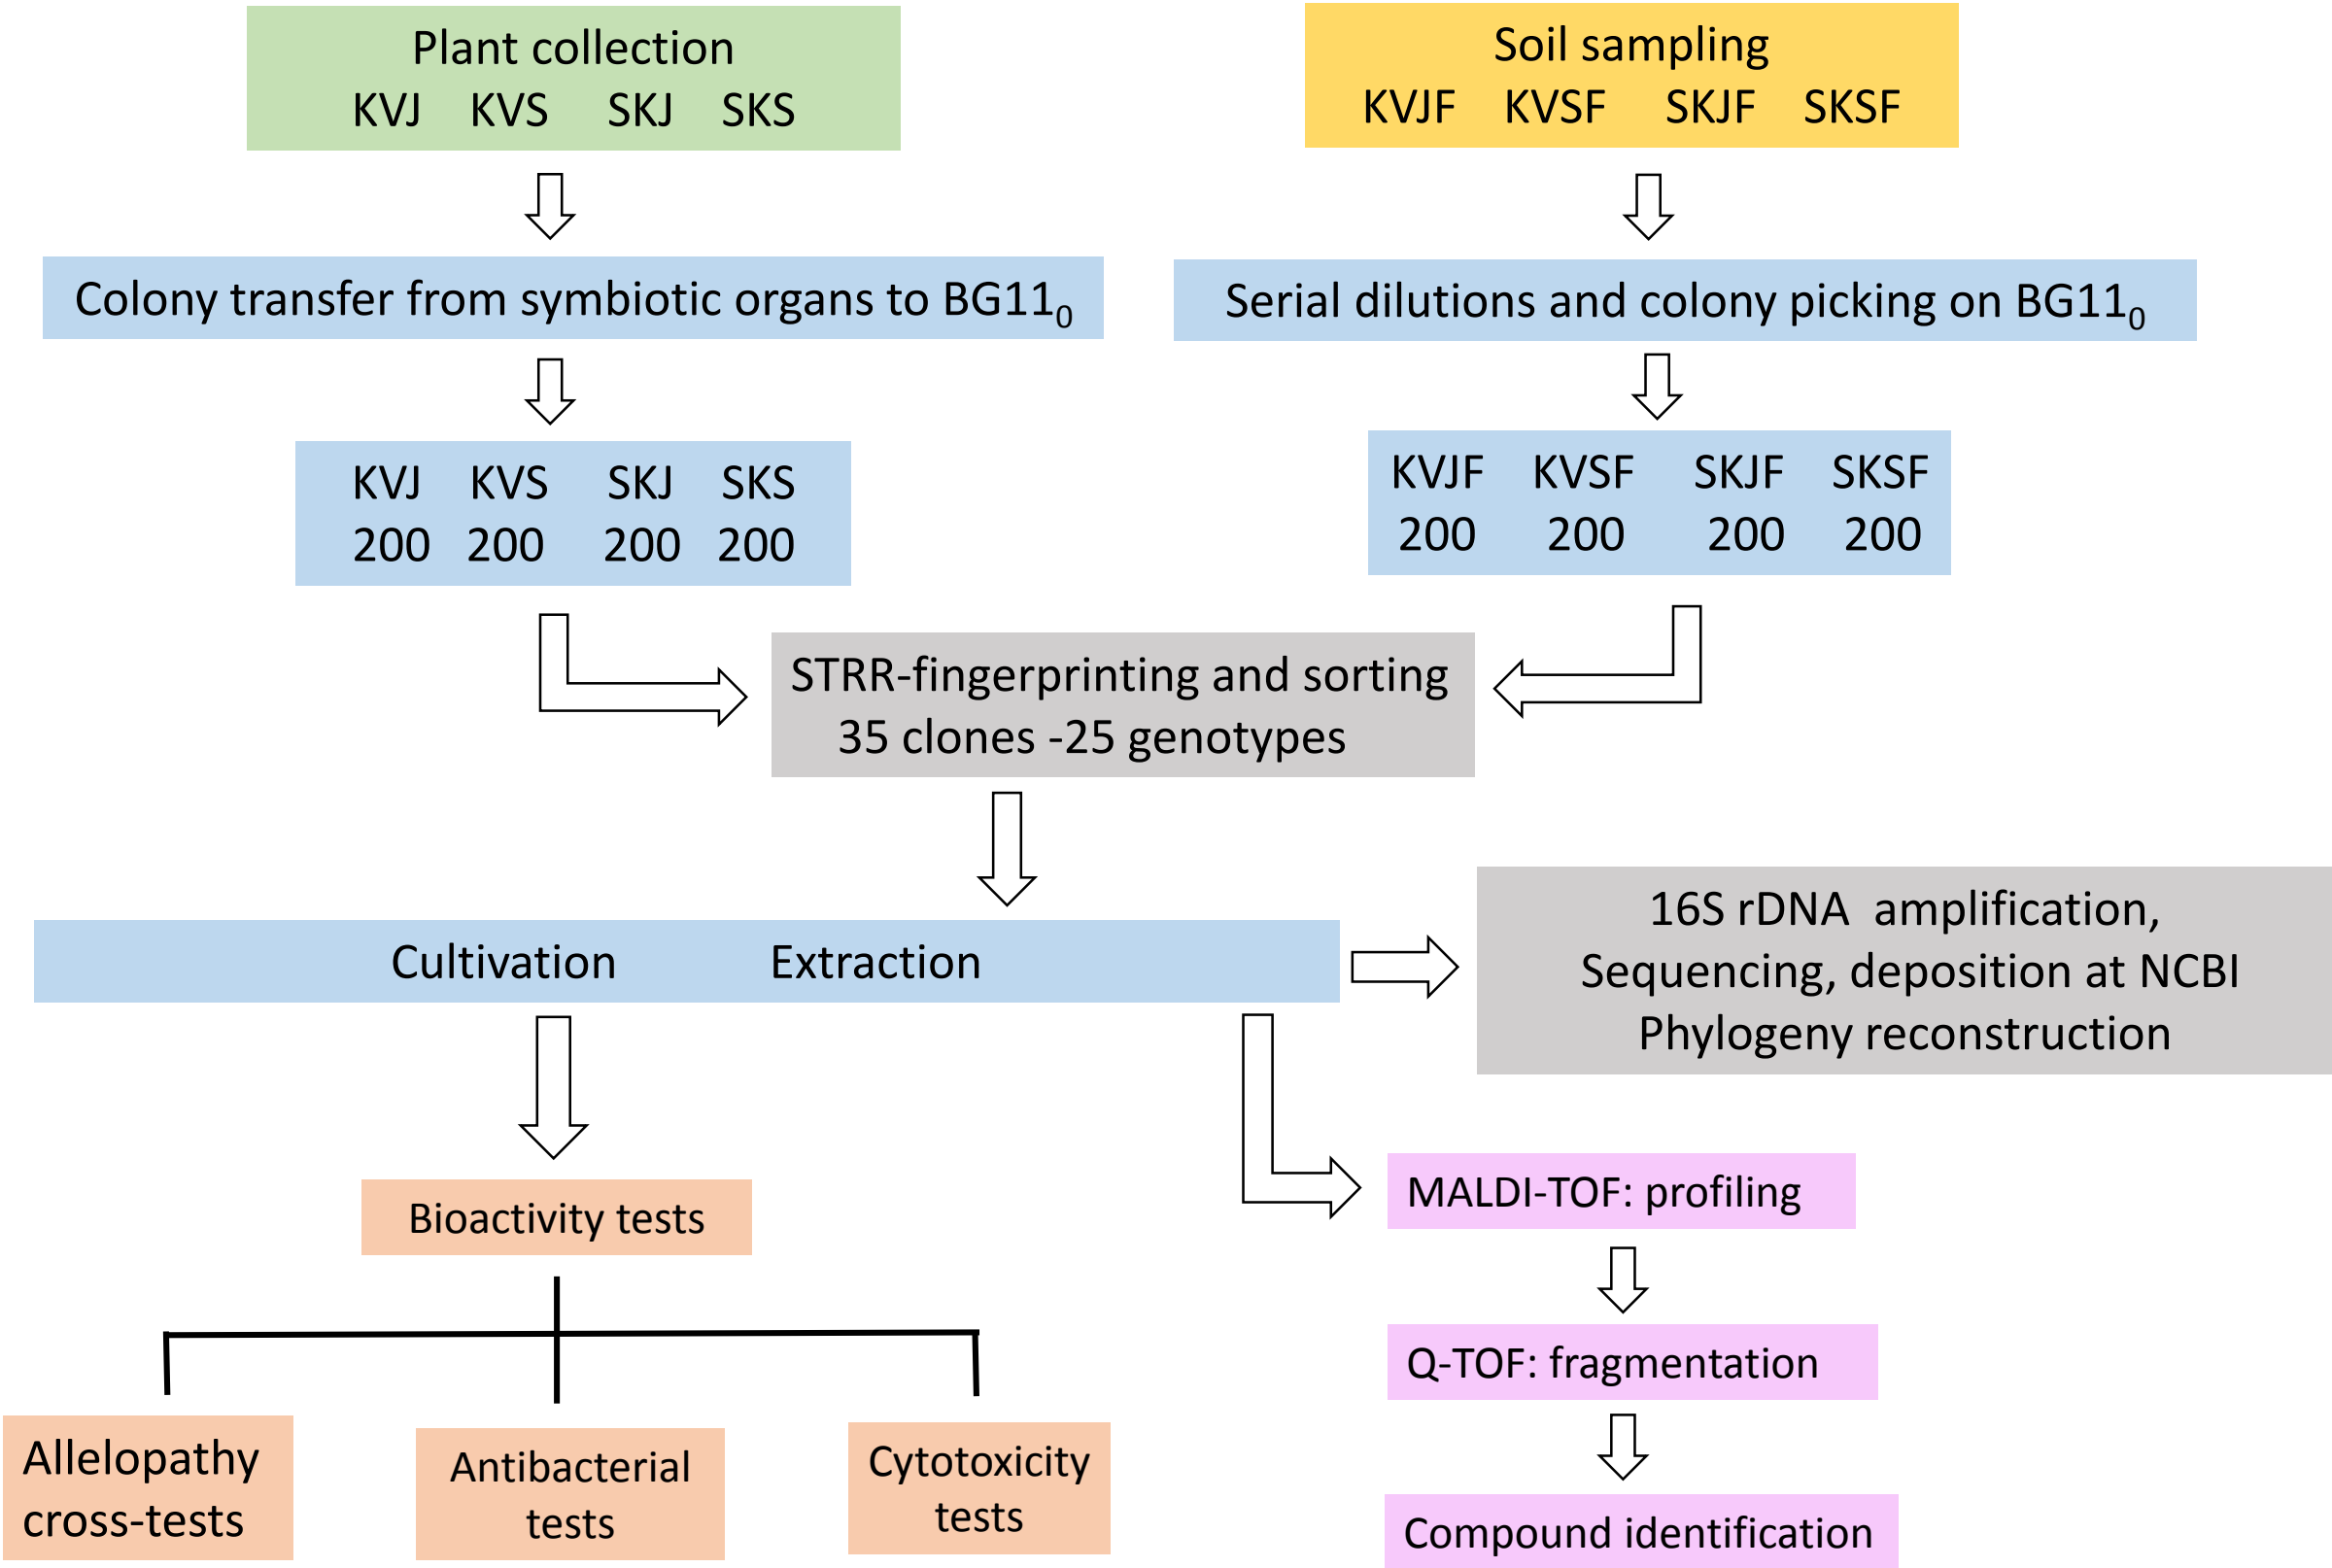

Supplement: Image_4.PDF [file Image_4.PDF]
